# Supplementary material
Source: Springer Nature journal article supplement (https://www.springermedizin.de/resource/supplementary/12947_2009_279_MOESM4_ESM.pdf/9556602)

## Baseline

Normal

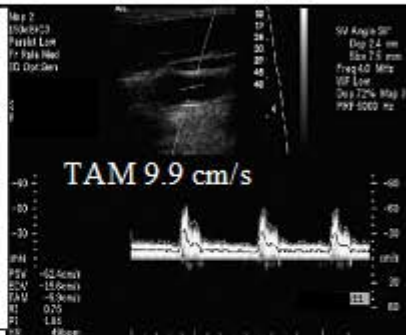

## Mental Stress

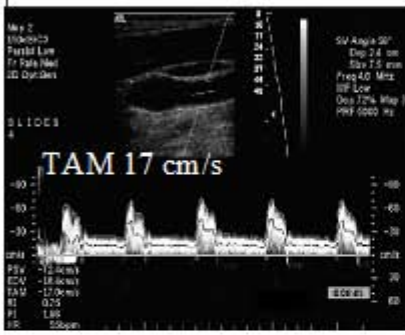

Hypertensive

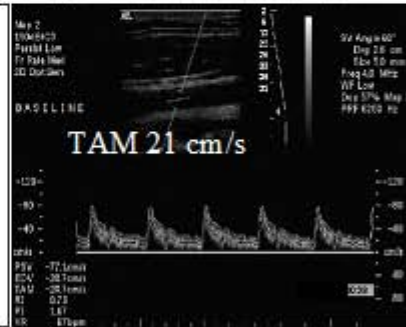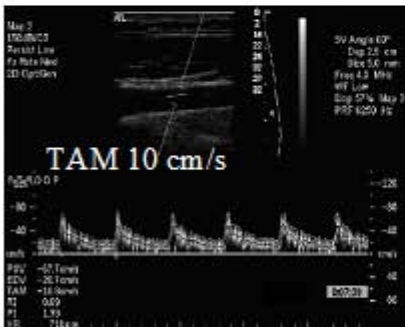

Supplement: MOESM4 [file 9556602]
